# Supplementary material for: Enhanced thermoelectric properties of Bi2(Te1−xSex)3-based compounds as n-type legs for low-temperature power generation
Source: Royal Society of Chemistry journal article supplement (doi:10.1039/c2jm34608g), 2012-01-01
Supplement: c2jm34608g.pdf [file c2jm34608g.pdf]

## Supplemental Information for

# Enhanced thermoelectric properties of $\text{Bi}_2(\text{Te}_{1-x}\text{Se}_x)_3$ -based compounds as n-type legs for low-temperature power generations

Shanyu Wang<sup>a,b</sup>, Gangjian Tan<sup>a</sup>, Wenjie Xie<sup>a</sup>, Gang Zheng<sup>a</sup>, Han Li<sup>a</sup>,  
Jihui Yang<sup>b</sup>, Xinfeng Tang<sup>a,\*</sup>

<sup>a</sup> State Key Laboratory of Advanced Technology for Materials Synthesis and Processing, Wuhan University of Technology, Wuhan 430070, China

<sup>b</sup> Materials Science and Engineering Department, University of Washington, Seattle, WA 98105-2120, USA

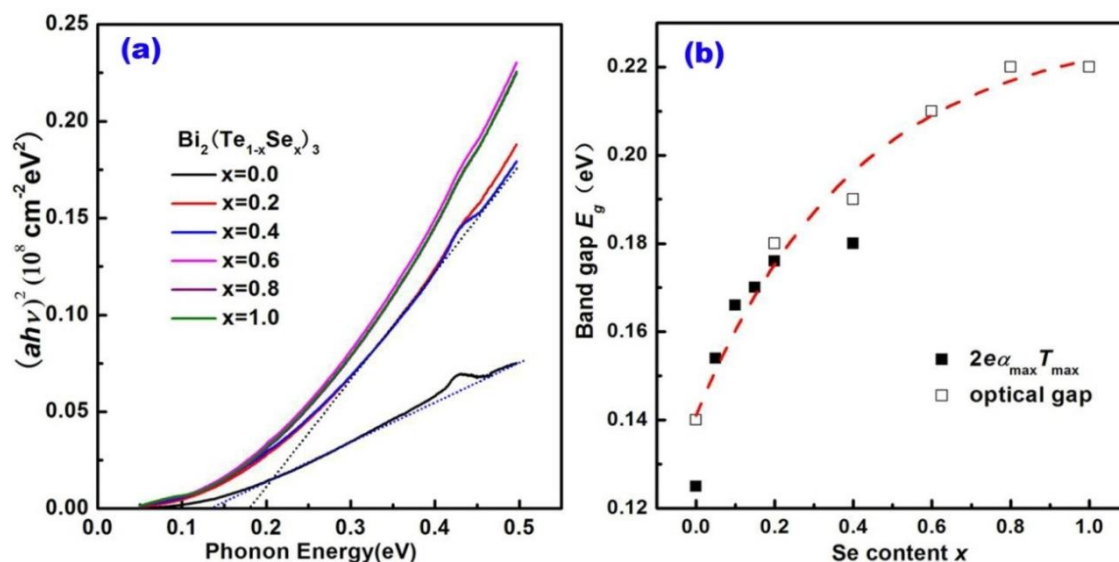

Figure S1 (a) IR spectrums and (b) optical band gap of  $\text{Bi}_2(\text{Te}_{1-x}\text{Se}_x)_3+0.08\% \text{ wt I}$  ( $x=0.1-1.0$ ) compounds, and the unfilled cubic symbols are the results obtained from the maximum Seebeck coefficients according to the formula  $E_g=2e\alpha_{\text{max}}T_{\text{max}}$ .

\* Corresponding author.

E-mail address: [tangxf@whut.edu.cn](mailto:tangxf@whut.edu.cn) (X. F. Tang) Tel.: +86-027-87662832; fax: +86-027-87860863.

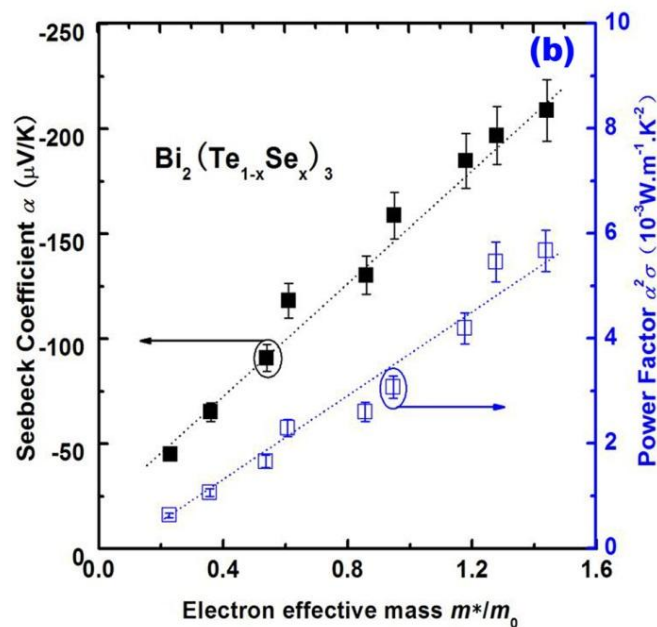

Figure S2 Seebeck coefficient and power factor at 300 K shown as a function of  $m^*/m_0$  for  $\text{Bi}_2(\text{Te}_{1-x}\text{Se}_x)_3+0.08\% \text{ wt I}$  ( $x=0.0-1.0$ ) solid solutions.

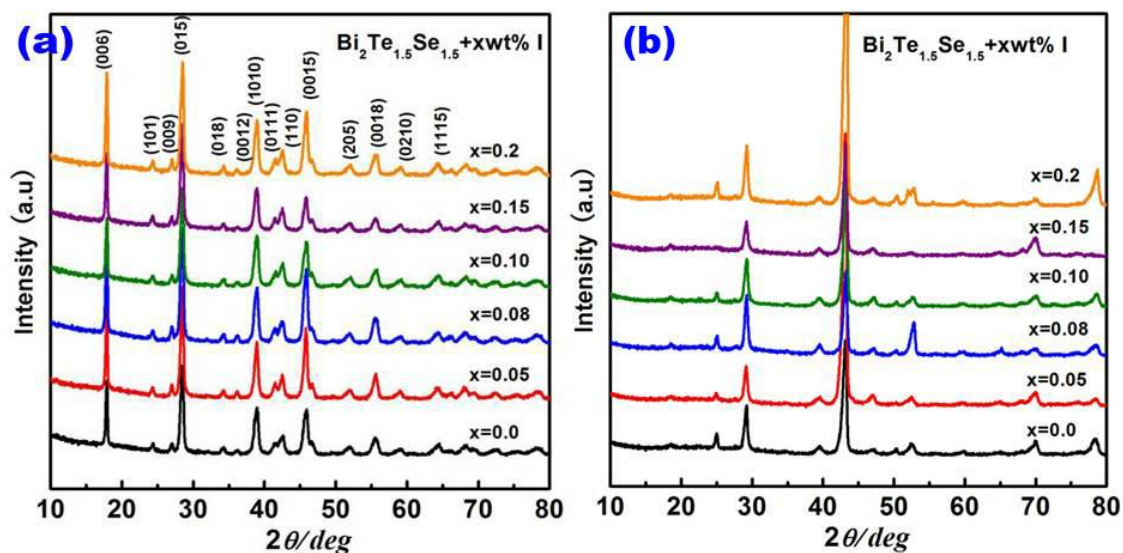

Figure S3 (a) Powder and (b) bulk XRD patterns for  $\text{Bi}_2(\text{Te}_{0.5}\text{Se}_{0.5})_3$  compounds with different electron concentrations, and the measured surfaces of bulk XRD are perpendicular to the ZM direction.
